---

# Erratum

Armstrong DG, Lavery LA, Vazquez JR, Short B, Kimbriel HR, Nixon BP, Boulton AJM: Clinical efficacy of the first metatarsophalangeal joint arthroplasty as a curative procedure for hallux interphalangeal joint wounds in patients with diabetes. *Diabetes Care* 26:3284–3287, 2003

In the abstract of the above-listed article, the first sentence of RESEARCH DESIGN AND METHODS should read: “We evaluated 41 patients with ulcers classified as University of Texas Grade 1A or 2A at the plantar aspect of the hallux interphalangeal joint using a case-control model” (i.e., “hallux interphalangeal” replaces “first metatarsophalangeal”).
